# Supplementary material
Source: PubMed Central journal article supplement (PMC1326926)

Fig A

**Age adjusted**

- Tunstall-Pedoe<sup>31</sup>
- Kuusisto<sup>28</sup>
- Laakso<sup>29</sup>
- Kannel<sup>22</sup>
- Butler<sup>13</sup>
- Qvist<sup>30</sup>
- Simons<sup>23</sup>
- Nilsson<sup>32</sup>

**Multiple adjusted**

- Akabane\*
- KMIC\*
- Tanno\*
- CVDFACTS\*
- Collins<sup>24</sup>
- Newcastle\*
- Sievers<sup>19</sup>
- ALSA\*
- ANHF\*
- Singapore NHS92\*
- Singapore Heart\*
- Heyden<sup>16</sup>
- Collins<sup>24</sup>
- Keil<sup>21</sup>
- Perth\*
- Fletcher Challenge\*
- Pan<sup>14</sup>
- Seeman<sup>20</sup>
- Juutilainen<sup>34</sup>
- Keil<sup>21</sup>
- Imazu<sup>33</sup>
- Melbourne\*
- Jousilahti<sup>27</sup>
- Busselton\*
- Folsom<sup>25</sup>
- Barrett-Connor<sup>17</sup>
- Kleinman<sup>15</sup>
- Fraser<sup>18</sup>
- Vilbergsson<sup>26</sup>

**Overall**

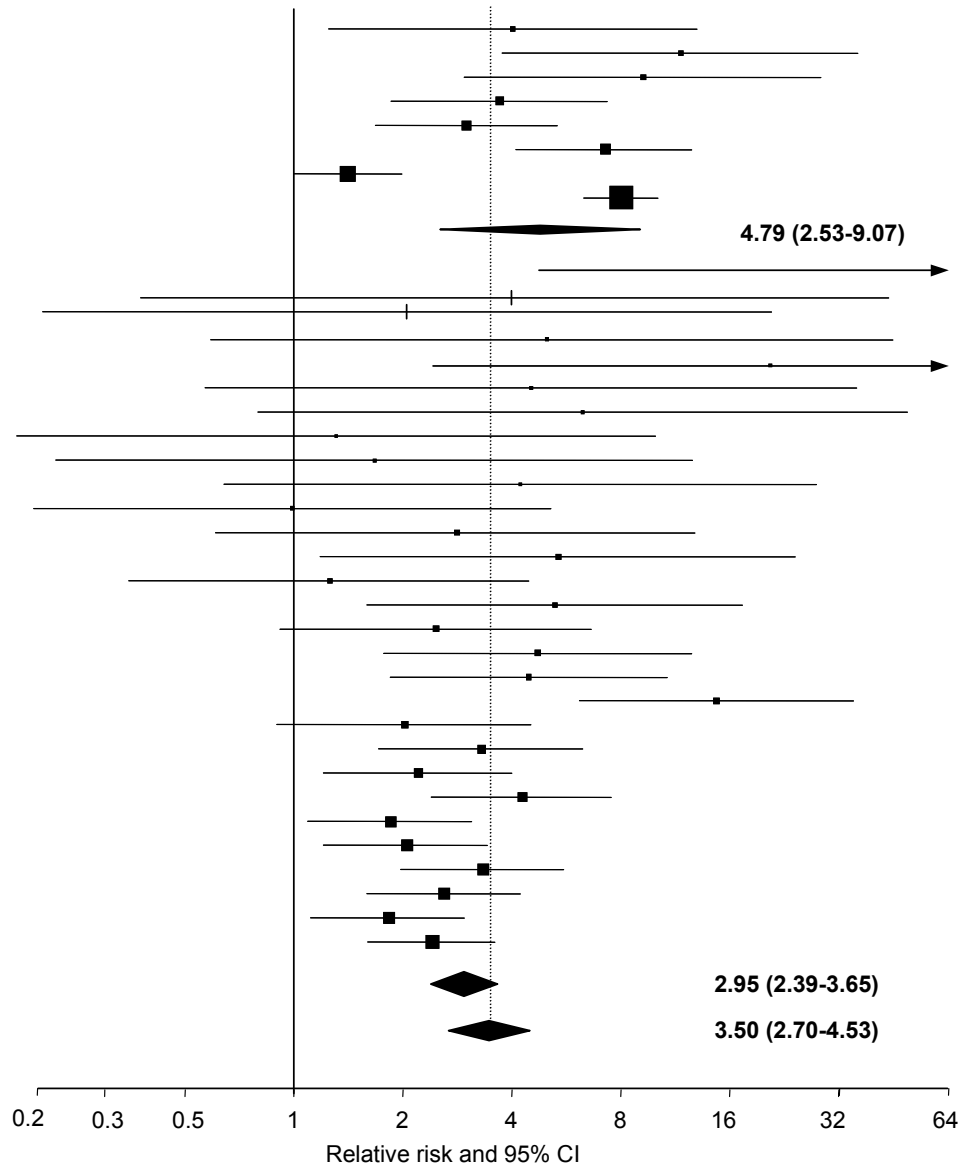

Supplement: bmj_38678.389583.7C_1.pdf [file bmj_38678.389583.7C_1.pdf]
