# Supplementary material
Source: PubMed Central journal article supplement (PMC1326926)

Fig C.

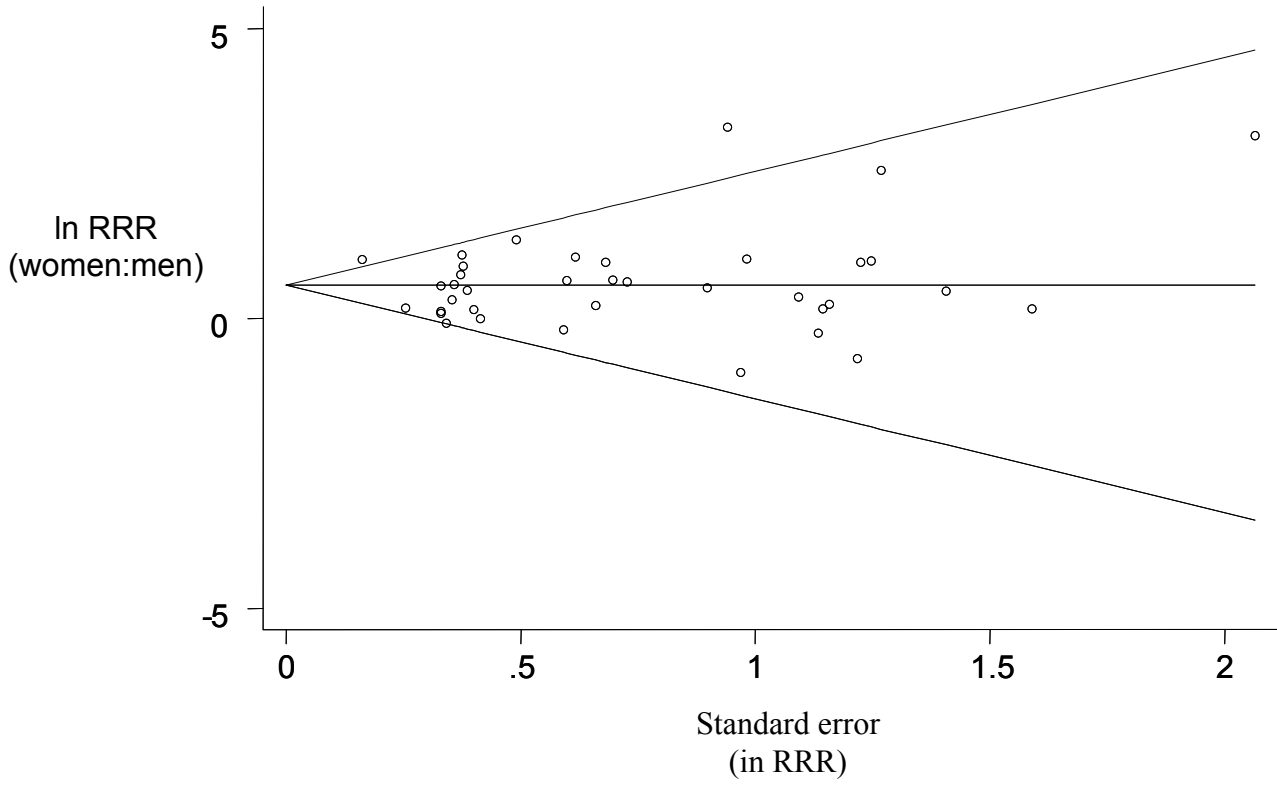

Supplement: bmj_38678.389583.7C_3.pdf [file bmj_38678.389583.7C_3.pdf]
